# Supplementary material
Source: PubMed Central journal article supplement (PMC55371)
Supplement: pnas_98_16_9050__10.pdf [file pnas_98_16_9050__10.pdf]

Supplementary material for Xuan *et al.* (2001) *Proc. Natl. Acad. Sci. USA* **98** (16), 9050–9055. (10.1073/pnas.161283798)

**Table 1. Source of antibodies**

| <b>Antibody</b>              | <b>Company</b>                    |
|------------------------------|-----------------------------------|
| Anti-JAK1                    | Transduction Laboratory           |
| Anti-JAK2                    | Upstate Biotechnology             |
| Anti-JAK3                    | Santa Cruz, Upstate Biotechnology |
| Anti-TYK2                    | Santa Cruz Biotechnology          |
| Anti-pTyr(1022/1023)-JAK1    | Affinity BioReagents              |
| Anti-pTyr(1007/1008)-JAK2    | Affinity BioReagents              |
| Anti-STAT1                   | Santa Cruz Biotechnology          |
| Anti-pTyr(701)-STAT1         | Upstate Biotechnology             |
| Anti-STAT2                   | Santa Cruz Biotechnology          |
| Anti-STAT3                   | Santa Cruz Biotechnology          |
| Anti-pTyr(704)-STAT3         | Upstate Biotechnology             |
| Anti-STAT4                   | Santa Cruz Biotechnology          |
| Anti-STAT5A                  | Santa Cruz Biotechnology          |
| Anti-STAT5B                  | Santa Cruz Biotechnology          |
| Anti-pTyr(694/699)-STAT5A/5B | Upstate Biotechnology             |
| Anti-STAT6                   | Santa Cruz Biotechnology          |
| Anti-pTyr(641)-STAT6         | Upstate Biotechnology             |
| 4G 10                        | Upstate Biotechnology             |
