# Supplementary material
Source: PubMed Central journal article supplement (PMC55371)
Supplement: pnas_98_16_9050__11.pdf [file pnas_98_16_9050__11.pdf]

**Table 2. Rectal temperature and heart rate on the day of the 30-min coronary occlusion**

|                                      | Preocclusion | Occlusion  |            |            | Reperfusion |            |            |
|--------------------------------------|--------------|------------|------------|------------|-------------|------------|------------|
|                                      |              | 5 min      | 15 min     | 30 min     | 1 min       | 10 min     | 15 min     |
| <b><i>Temperature (°C)</i></b>       |              |            |            |            |             |            |            |
| <b>Group XIII</b>                    | 37.2 ± 0.1   | 37.1 ± 0.2 | 37.0 ± 0.1 | 37.1 ± 0.2 | 36.9 ± 0.1  | 36.8 ± 0.1 | 37.0 ± 0.1 |
| <b>Group XIV</b>                     | 37.1 ± 0.1   | 37.3 ± 0.1 | 37.2 ± 0.1 | 37.4 ± 0.1 | 37.4 ± 0.1  | 37.4 ± 0.2 | 37.2 ± 0.3 |
| <b>Group XV</b>                      | 37.2 ± 0.1   | 37.3 ± 0.1 | 37.3 ± 0.1 | 37.3 ± 0.1 | 37.1 ± 0.1  | 36.9 ± 0.1 | 36.9 ± 0.2 |
| <b>Group XVI</b>                     | 37.0 ± 0.1   | 37.1 ± 0.1 | 37.1 ± 0.0 | 37.0 ± 0.0 | 37.0 ± 0.0  | 37.0 ± 0.1 | 37.0 ± 0.1 |
| <b>Group XVII</b>                    | 36.9 ± 0.0   | 37.1 ± 0.0 | 37.0 ± 0.1 | 37.0 ± 0.0 | 37.0 ± 0.0  | 37.0 ± 0.1 | 37.0 ± 0.1 |
| <b><i>Heart rate (beats/min)</i></b> |              |            |            |            |             |            |            |
| <b>Group XIII</b>                    | 594 ± 34     | 578 ± 25   | 581 ± 24   | 596 ± 23   | 600 ± 21    | 591 ± 26   | 595 ± 31   |
| <b>Group XIV</b>                     | 634 ± 22     | 625 ± 26   | 632 ± 28   | 627 ± 28   | 601 ± 31    | 624 ± 29   | 632 ± 30   |
| <b>Group XV</b>                      | 591 ± 21     | 598 ± 21   | 612 ± 22   | 578 ± 21   | 617 ± 25    | 591 ± 17   | 581 ± 22   |
| <b>Group XVI</b>                     | 580 ± 12     | 592 ± 16   | 581 ± 21   | 593 ± 25   | 596 ± 25    | 598 ± 25   | 581 ± 20   |
| <b>Group XVII</b>                    | 617 ± 18     | 659 ± 17   | 653 ± 17   | 661 ± 16   | 657 ± 17    | 665 ± 16   | 671 ± 18   |

Measurements of rectal temperature and heart rate were taken before the 30-min coronary occlusion (preocclusion), at 5, 15, and 30 min into the 30-min occlusion, and at 1, 10, and 15 min after reperfusion. Rectal temperature was continuously monitored and carefully controlled throughout the experiment. The experimental protocols for the five groups of mice are specified in supplemental Fig. 9. Data are means ± SEM.
