# Supplementary material
Source: PubMed Central journal article supplement (PMC55371)
Supplement: pnas_98_16_9050__12.pdf [file pnas_98_16_9050__12.pdf]

**Table 3. Size of left ventricle (LV), risk region (RR), and infarct**

|                   | Age<br>(g) | BW<br>(g)  | LV<br>(mg)  | RR<br>(mg) | Infarct<br>(mg) | RR<br>(% of LV) | Infarct<br>(% of RR) | Infarct<br>(% of LV) |
|-------------------|------------|------------|-------------|------------|-----------------|-----------------|----------------------|----------------------|
| <b>Group XIII</b> | 8.2 ± 0.5  | 35.0 ± 1.2 | 126.6 ± 7.4 | 45.1 ± 3.3 | 22.1 ± 1.8      | 36.3 ± 2.6      | 49.1 ± 2.1           | 17.9 ± 1.6           |
| <b>Group XIV</b>  | 8.8 ± 0.3  | 36.4 ± 0.9 | 130.6 ± 4.3 | 46.3 ± 4.0 | 23.8 ± 3.3*     | 35.8 ± 3.0      | 49.4 ± 3.4*          | 18.0 ± 2.3*          |
| <b>Group XV</b>   | 8.0 ± 0.2  | 35.7 ± 1.0 | 134.3 ± 4.9 | 48.8 ± 5.6 | 10.1 ± 1.9*     | 36.9 ± 4.3      | 20.7 ± 2.3*          | 7.8 ± 1.4*           |
| <b>Group XVI</b>  | 8.5 ± 0.6  | 34.2 ± 0.6 | 113.3 ± 4.7 | 47.3 ± 3.6 | 28.0 ± 3.0*     | 41.9 ± 3.1      | 58.5 ± 3.5*          | 25.0 ± 2.6           |
| <b>Group XVII</b> | 8.6 ± 0.4  | 34.9 ± 0.6 | 121.0 ± 3.6 | 50.3 ± 3.2 | 27.4 ± 2.6*     | 41.4 ± 2.1      | 53.6 ± 3.3*          | 22.5 ± 2.0           |

BW, body weight. Data are means ± SEM. \*,  $P < 0.05$  vs. group XIV.
